# Supplementary material for: Repression of hypoxia-inducible factor-1 contributes to increased mitochondrial reactive oxygen species production in diabetes
Source: eLife. 2022 Feb 15;11:e70714. doi: 10.7554/eLife.70714 (PMC8846593; doi:10.7554/eLife.70714)
Supplement: Figure 1—source data 1. [file elife-70714-fig1-data1.xlsx]

## Sheet: Sheet1
	Figure 1A			Figure 1B
	CPH in controls			CPH in patients with diabetes
	C-0h	C-1h		D-0h	D-1h
	1.815	2.171		2.107	3.531
	1.051	1.882		2.291	3.098
	1.304	2.311		2.149	2.239
	1.461	1.414		2.717	2.29
	1.948	1.87		2.57	1.378
	1.351	1.913		1.296	1.917
	1.618	1.419		1.384	2.849
	1.319	1.442		1.376	1.886
	1.347	1.289		1.47	2.517
	0.69	0.946		1.986	2.171
				1.198
				2.025
				1.95
