# Supplementary material for: Repression of hypoxia-inducible factor-1 contributes to increased mitochondrial reactive oxygen species production in diabetes
Source: eLife. 2022 Feb 15;11:e70714. doi: 10.7554/eLife.70714 (PMC8846593; doi:10.7554/eLife.70714)
Supplement: Figure 2—source data 1. [file elife-70714-fig2-data1.xlsx]

## Sheet: Sheet1
	Figure 2B
	Relative HRE-luciferase activity in mIMCD3 cells (fold induction)
		Normoxia	Hypoxia	Hypoxia
	Glucose (mM)	5.5	5.5	30
	treatment	Vehicle	Vehicle	Vehicle
	Exp-1	1	3.57218	3.31582
	Exp-2	1	3.69689	2.74054
	Exp-3	1	4.03093	2.4817
	Exp-4	1	3.64814	3.44866
	Exp-5	1	5.5716	3.99246
	Exp-6	1	4.04706	3.36204
	Figure 2C
	Fold change of apoptosis in mIMCD3 cells
		Normoxia	Hypoxia	Hypoxia
	Glucose (mM)	5.5	5.5	30
	treatment	Vehicle	Vehicle	Vehicle
	Exp-1	1	1.83273	5.27273
	Exp-2	1	1.63402	3.75258
	Exp-3	1	1.28517	2.60076
	Exp-4	1	2.01866	3.41045
	Figure 2D
	Relative HRE-luciferase activity in mIMCD3 cells (fold induction)
		Hypoxia	Hypoxia
	Glucose (mM)	30	30
	treatment	Vehicle	DMOG
	Exp-1	1	3.05487
	Exp-2	1	2.88463
	Exp-3	1	3.76035
	Exp-4	1	2.7517
	Exp-5	1	2.55126
	Exp-6	1	1.79825
	Figure 2E
	Fold change of apoptosis in mIMCD3 cells
		Hypoxia	Hypoxia
	Glucose (mM)	30	30
	treatment	Vehicle	DMOG
	Exp-1	1	0.550345
	Exp-2	1	0.666209
	Exp-3	1	0.587719
	Exp-4	1	0.599562
	Figure 2F
	Fold change of Caspase 3/7 activity normalized to DNA concentration in mIMCD3 cells
		Normoxia	Hypoxia	Hypoxia
	Glucose (mM)	5.5	30	30
	treatment	Vehicle	Vehicle	DMOG
	Exp-1	1	-	1.755
	Exp-2	1	1.928	1.52
	Exp-3	1	1.947	1.592
	Exp-4	1	2.877	1.497
	Figure 2G
	Fold change of Caspase 3/7 activity normalized to DNA concentration in mIMCD3 cells
		Normoxia	Hypoxia	Hypoxia
	Glucose (mM)	5.5	30	30
	treatment	Vehicle	Vehicle	NAC
	Exp-1	1	3.027	1.215
	Exp-2	1	1.877	1.541
	Exp-3	1	2.089	1.563
	Exp-4	1	1.87	1.048
