# Supplementary material for: Repression of hypoxia-inducible factor-1 contributes to increased mitochondrial reactive oxygen species production in diabetes
Source: eLife. 2022 Feb 15;11:e70714. doi: 10.7554/eLife.70714 (PMC8846593; doi:10.7554/eLife.70714)
Supplement: Figure 3—source data 1. [file elife-70714-fig3-data1.xlsx]

## Sheet: Sheet1
	Figure 3A
	Percentage of mitosox intensity in mIMCD3 cells
		Normoxia	Normoxia	Hypoxia	Hypoxia	Hypoxia	Hypoxia
	Glucose (mM)	5.5	30	5.5	30	5.5	30
	treatment	Vehicle	Vehicle	Vehicle	Vehicle	DMOG	DMOG
	Exp-1	100	100	133.593	178.286	119.864	154.333
	Exp-2	100	165.781	138.462	329.236	148.88	128.822
	Exp-3	100	83.6653	124.245	265.116	124.245	221.243
	Exp-4	100	115.431	143.426	213.546	154.183	166.222
	Exp-5	100	124.249	107.415	191.583	100	154.333
	Figure 3B
	VHL gene expression in mIMCD3 cells
		Hypoxia	Hypoxia
	Glucose (mM)	30	30
	siRNA	Control	VHL
	Exp-1	100	9.371
	Exp-2	100	12.831
	Exp-3	100	13.18
	Figure 3D
	Percentage of mitosox intensity in mIMCD3 cells
		Hypoxia	Hypoxia
	Glucose (mM)	30	30
	siRNA	Control	VHL
	Exp-1	100	74.8466
	Exp-2	100	76.0355
	Exp-3	100	71.0345
	Exp-4	100	65.9649
	Exp-5	100	65
	Figure 3F
	Percentage of mitosox intensity in mIMCD3 cells
		Hypoxia	Hypoxia
	Glucose (mM)	30	30
	Transfection	GFP	GFP-HIF-1alpha
	Exp-1	100	70.9677
	Exp-2	100	91.1565
	Exp-3	100	92.2481
	Exp-4	100	67.5676
	Exp-5	100	67.1717
	Exp-6	100	65.7895
