# Supplementary material for: Repression of hypoxia-inducible factor-1 contributes to increased mitochondrial reactive oxygen species production in diabetes
Source: eLife. 2022 Feb 15;11:e70714. doi: 10.7554/eLife.70714 (PMC8846593; doi:10.7554/eLife.70714)
Supplement: Figure 4—figure supplement 1—source data 1. [file elife-70714-fig4-figsupp1-data1.xlsx]

## Sheet: Sheet1
	Fig. 4 - figure supplement 1
	Panel A
	Quantification of Pimnidazole immunofluorescent signal (fold induction)
	WT	db/db	db/db
	Placebo	Placebo	DMOG
	1	1.553	1.05869
	1.42109	1.73752	1.10781
	0.578915	2.44009	0.867789
	0.360182	1.51089	0.919248
	1.63982	2.01602
	Panel B
	Quantification of Pimnidazole immunofluorescent signal (fold induction)
	WT-control	WT-diabetic	Egln1+/- Control	Egln1+/- diabetic
	1.07285	1.29834	0.825441	1.06935
	0.991424	1.25272	1.18491	1.44605
	1.20695	1.40458	0.710738	1.13535
	0.728776	1.47914	0.912701	0.896899
		1.10193	0.792299
		1.55637	0.865111
