# Supplementary material for: Repression of hypoxia-inducible factor-1 contributes to increased mitochondrial reactive oxygen species production in diabetes
Source: eLife. 2022 Feb 15;11:e70714. doi: 10.7554/eLife.70714 (PMC8846593; doi:10.7554/eLife.70714)
Supplement: Figure 4—figure supplement 2—source data 1. [file elife-70714-fig4-figsupp2-data1.xlsx]

## Sheet: Sheet1
	Fig. 4 - figure supplement 2
	Panel A
	Blood glucose levels (mM)
	db/db	db/db
	Placebo	DMOG
	22.1	23.9
	23.6	24.9
	22.7	16.9
	15.2	25.5
	27.4	15.4
	21.6	28
	19.9	24.8
	Panel B
	BNIP3 gene expression in kidneys
	db/db	db/db
	Placebo	DMOG
	1.0787	1.72112
	0.968372	1.61679
	0.815803	1.54554
	1.01436	1.56331
	1.12276
	PGK1 gene expression in kidneys
	db/db	db/db
	Placebo	DMOG
	0.858661	1.54456
	0.76093	1.72137
	1.04972	1.67528
	1.33069	1.80476
		1.56281
	SDF-1alpha gene expression in kidneys
	db/db	db/db
	Placebo	DMOG
	0.807407	1.15363
	1.16388	1.5161
	0.727607	1.52943
	1.30318	1.6805
	0.997926
