# Supplementary material for: Repression of hypoxia-inducible factor-1 contributes to increased mitochondrial reactive oxygen species production in diabetes
Source: eLife. 2022 Feb 15;11:e70714. doi: 10.7554/eLife.70714 (PMC8846593; doi:10.7554/eLife.70714)
Supplement: Figure 4—figure supplement 3—source data 1. [file elife-70714-fig4-figsupp3-data1.xlsx]

## Sheet: Sheet1
	Fig. 4 - figure supplement 3
	Panel A
	HbA1c levels (mmol/mol)
	WT-diabetic	Egln1+/- diabetic
	42	40
	53	51
	28	38
	34	52
	43	54
	49
	42
	72
	Panel B
	PHD2 gene expression in kidneys
	WT-control	Egln1+/- Control	WT-diabetic	Egln1+/- diabetic
	1.01661	0.528248	1.10108	0.307366
	1.14129	0.494741	0.778101	0.418521
	1.1049	0.569921	0.818032	0.405345
	1.07749	0.553151	0.837238	0.37496
	0.952778	0.545903		0.369839
	0.837568	0.560252
	0.869362	0.581867
	GLUT3 gene expression in kidneys
	WT-control	Egln1+/- Control	WT-diabetic	Egln1+/- diabetic
	1.31715	0.91589	0.595437	1.01005
	1.34945	0.66887	0.722014	0.979487
	1.13108	0.928227	0.621078	1.01308
	0.651762	1.06495	0.605836	0.999272
	0.685545	0.95935		1.05393
	0.850982	0.587235
	1.01403	0.736137
		1.11883
