# Supplementary material for: Repression of hypoxia-inducible factor-1 contributes to increased mitochondrial reactive oxygen species production in diabetes
Source: eLife. 2022 Feb 15;11:e70714. doi: 10.7554/eLife.70714 (PMC8846593; doi:10.7554/eLife.70714)
Supplement: Figure 4—source data 1. [file elife-70714-fig4-data1.xlsx]

## Sheet: Sheet1
	Figure 4A
	Quantification of relative HIF-1alpha to Pimnidazole immunofluorescent signal (fold induction)
	WT	db/db	db/db
	Placebo	Placebo	DMOG
	1	0.775442	1.42218
	0.931508	0.425106	1.92314
	1.06849	0.342903	1.65863
	1.46187	0.369061	1.59056
	0.538131	0.452651
	Figure 4B
	HNE adduct concentration in kidney
	WT	db/db	db/db
	Placebo	Placebo	DMOG
	2.33425	2.71637	2.11944
	1.92943	3.87535	2.7468
	2.29928	3.16834	1.95018
	1.91373	3.43077	2.14777
	2.1193	4.37933	2.1597
	2.16439	3.00309	3.2764
	2.75294	5.20895	1.524
	1.46425
	2.06825
	3.40296
	Figure 4C
	Quantification of relative HIF-1alpha to Pimnidazole immunofluorescent signal (fold induction)
	WT-control	WT-diabetic	Egln1+/- Control	Egln1+/- diabetic
	0.759405	0.24228	1.45105	1.62597
	1.3086	0.48356	1.36382	1.1436
	1.05683	0.474836	0.918425	0.533273
	0.875162	0.28998	1.04575	0.848032
		0.207784	1.66596
		0.4962	1.035
	Figure 4D
	HNE adduct concentration in kidney
	WT-control	WT-diabetic	Egln1+/- Control	Egln1+/- diabetic
	1.48551	5.8499	1.66646	2.48839
	1.8013	3.79766	1.71429	1.85873
	1.54118	3.58879	1.20757	3.31791
	1.49736	3.3146	3.54499	2.95925
	1.6203	4.04562	2.31524	1.37633
	1.47015	2.2857
		5.31438
		3.17656
	Figure 4E
	State 3 PM: Complex I - meditated mitochondrial respiration
	WT	db/db	db/db
	Placebo	Placebo	DMOG
	2.2169	2.28209	2.2934
	1.65195	2.00645	2.18166
	1.9693	2.50786	2.08534
	2.22301	2.32384	1.94053
		2.47782	1.96599
		2.33823	2.01028
		2.28853	2.10783
		2.8364	2.0917
		2.38018	1.5427
	State 3 PMS: Complex I+II - meditated mitochondrial respiration
	WT	db/db	db/db
	Placebo	Placebo	DMOG
	4.32924	4.6609	4.8455
	3.23887	4.07501	4.13032
	3.65984	4.98793	4.54901
	4.05113	4.71422	4.05753
		4.67916	4.18699
		4.45221	4.49966
		4.43441	4.02903
		5.5534	4.43684
		4.77819	3.46487
	Leak respiration
	WT	db/db	db/db
	Placebo	Placebo	DMOG
	0.239362	0.248484	0.238753
	0.196171	0.219609	0.212541
	0.205397	0.24171	0.240289
	0.239286	0.256004	0.2065
		0.25881	0.210894
		0.255369	0.263723
		0.256353	0.247175
		0.303139	0.26316
		0.27042	0.19028
	Figure 4F
	State 3 PM: Complex I - meditated mitochondrial respiration
	WT-control	WT-diabetic	Egln1+/- Control	Egln1+/- diabetic
	3.65258	3.9642	4.67282	4.1797
	3.6701	3.93483	4.97543	3.4259
	3.15395	3.99122	3.06015	4.48129
	3.64818	3.84139	5.48251	3.67754
	3.07895	3.06259	4.52923	4.02469
	4.25619	4.08834	4.35785	3.54431
	3.00661	3.84935	3.42306	3.26439
	4.36235	4.49061	6.19865	3.99082
	2.89076	3.0381	4.29262	3.95255
	3.21867	3.21703	4.03342	3.80342
	3.11372	3.68111	4.30616	4.10342
	3.25371	3.88117
	3.3931	2.8234
	3.35312	2.94813
	3.99244	3.12983
	3.68127	3.41394
		4.12502
	State 3 PMS: Complex I+II - meditated mitochondrial respiration
	WT-control	WT-diabetic	Egln1+/- Control	Egln1+/- diabetic
	6.35191	7.47711	8.14664	7.63744
	6.38288	6.72108	8.96854	6.3131
	6.15303	7.57332	5.08392	8.08792
	6.22754	6.67012	9.37507	6.61988
	5.73777	5.55591	7.76608	7.28033
	7.55816	7.08442	8.14028	7.26582
	5.54412	6.95944	5.8337	6.17064
	8.20876	7.39844	11.1251	7.13452
	5.97782	5.57509	7.46076	7.16974
	6.07542	6.37625	7.20801	6.66573
	6.30435	6.52173	7.36016	6.89427
	5.99196	7.24748
	6.96384	5.80614
	6.43133	5.9221
	6.68676	5.46053
	6.72947	6.20716
		7.71651
	Leak respiration
	WT-control	WT-diabetic	Egln1+/- Control	Egln1+/- diabetic
	0.3291	0.43	0.4917	0.364377
	0.3241	0.35	0.411	0.325136
	0.3579	0.4061	0.317	0.559213
	0.3276	0.3719	0.4395	0.349028
	0.3447	0.3452	0.4622	0.39713
	0.4033	0.5248	0.4735	0.386123
	0.2883	0.3502	0.3717	0.387624
	0.4295	0.3749	0.4959	0.409197
	0.331	0.3306	0.4293	0.401594
	0.3446	0.4381	0.4336	0.427947
	0.4103	0.37	0.3976	0.438274
	0.3546	0.4067
	0.4197	0.3935
	0.3732	0.4106
	0.3651	0.32
	0.4151	0.3807
		0.4498
	Figure 4G
	PDK1 gene expression in kidneys
	WT	db/db	db/db
	Placebo	Placebo	DMOG
	0.930751	0.899401	1.59238
	1.00204	0.679378	1.56821
	1.08191	0.504857	1.71284
	1.04141	0.855449	1.35142
		0.6564	1.30755
		0.78217	1.12978
		0.85689	1.01101
		0.61026	1.45731
		0.76814
	Figure 4H
	PDK1 gene expression in kidneys
	WT-control	WT-diabetic	Egln1+/- Control	Egln1+/- diabetic
	0.96574	0.758125	1.07999	0.984285
	1.01471	0.711851	1.04706	1.05646
	1.07747	0.907569	0.86106	0.885828
	1.17762	0.889055	1.35437	0.943061
	1.26472	0.818249	0.824555
		0.877173
	Figure 4J
	Percentage of mitosox intensity in mIMCD3 cells
		Hypoxia	Hypoxia
	Glucose (mM)	30	30
	Transfection	GFP	GFP-PDK1
	Exp-1	100	72.4374
	Exp-2	100	71.0509
	Exp-3	100	75.2658
	Exp-4	100	78.944
