# Supplementary material for: Repression of hypoxia-inducible factor-1 contributes to increased mitochondrial reactive oxygen species production in diabetes
Source: eLife. 2022 Feb 15;11:e70714. doi: 10.7554/eLife.70714 (PMC8846593; doi:10.7554/eLife.70714)
Supplement: Figure 5—source data 1. [file elife-70714-fig5-data1.xlsx]

## Sheet: Sheet1
	Figure 5A
	Quantification of KIM-1 immunofluorescent signal (fold induction)
	WT	db/db	db/db
	Placebo	Placebo	DMOG
	1.52533	2.14593	0.752111
	0.714982	1.72261	0.789953
	0.759691	2.86677	0.845805
		1.81903	0.175927
	Figure 5C
	Quantification of TUNEL-postive cells (%)
	WT	db/db	db/db
	Placebo	Placebo	DMOG
	5.02197	14.3934	3.25255
	4.86097	10.825	8.06165
	8.52667	24.577	1.55936
	1.30945	21.1991	2.55134
	Figure 5D
	Quantification of KIM-1 immunofluorescent signal (fold induction)
	WT-control	WT-diabetic	Egln1+/- Control	Egln1+/- diabetic
	0.27198	4.73477	1.39391	0.28187
	1.67496	3.96083	0.40538	0.82273
	1.05306	3.65211	0.49221	2.35114
		4.17964	1.01653	1.81385
		3.85812	0.20502
		2.4983
	Figure 5F
	Quantification of TUNEL-postive cells (%)
	WT-control	WT-diabetic	Egln1+/- Control	Egln1+/- diabetic
	1.94014	20.3773	8.66027	2.88206
	1.54689	23.0474	7.89643	0.82632
	0.242	23.2751	1.59819	17.9857
		28.5849	3.2367	4.78627
			1.07586
	Figure 5G
	Albuminuria: ratio of albumin to creatinine in mouse urine
	WT	db/db	db/db
	Placebo	Placebo	DMOG
	0.597035	0.730299	2.72329
	1.19606	37.2164	9.72926
	2.41466	0.808865	1.70624
	0.895387	17.5458	4.51572
	0.291722	9.37555	1.85509
	0.400455	17.205	8.15495
	1.20468	8.25009	5.00568
		1.98272	1.45861
		14.1435	3.74598
		30.1379
		6.95989
		20.0337
		4.76501
	Figure 5H
	Albuminuria: ratio of albumin to creatinine in mouse urine
	WT-control	WT-diabetic	Egln1+/- Control	Egln1+/- diabetic
	4.99947	31.126	19.427	8.06714
	7.76749	26.3587	15.0285	32.1322
	12.875	69.071	4.6444	10.5715
	11.69	96.6995	19.2007	14.9585
	11.8255	34.06	24.1008
	23.9471	50.0032
