# Supplementary material for: Repression of hypoxia-inducible factor-1 contributes to increased mitochondrial reactive oxygen species production in diabetes
Source: eLife. 2022 Feb 15;11:e70714. doi: 10.7554/eLife.70714 (PMC8846593; doi:10.7554/eLife.70714)
Supplement: Table 1—source data 1. [file elife-70714-table1-data1.xlsx]

## Sheet: Sheet1
	Table 1: Characteristics of Leprdb/db (db/db) and control mice prior to experiments
	Body weight (g)
	WT	db/db	db/db
	Placebo	Placebo	DMOG
	25.2	53	50
	28.5	46.3	40.4
	29.4	42.5	44.2
	28.1	52	55.9
	26	53.1	44.2
	29	38.5	47.7
	29	49.1	53
	27	49.6	48.5
	29	50.5	47.7
	26	53	55
	26	50	53
	28	46	53
	25	48	51
	28	51	53
		46	53
		50	51
	Blood glucose (mM)
	WT	db/db	db/db
	Placebo	Placebo	DMOG
	5.6	20.2	27.2
	9	17.8	28
	7.7	25.4	28
	6.6	25.4	17.1
	8	28	28
	6.4	25.4	28
	5.4	27.6	10.8
	8	20.5	16.3
	10.2	28	15.1
	6.5	17.6	21.3
	6.2	15.3	19.2
	5.2	19.5	12.2
	7.1	17.9	16.9
	8.4	18.8	17.6
		20.8	25.2
		12.1	18.6
	Age (weeks)
	WT	db/db	db/db
	Placebo	Placebo	DMOG
	16	16	16
	16	16	16
	16	16	16
	16	16	16
	16	20	16
	16	20	20
	16	20	20
	16	20	20
	16	20	20
	16	16	16
	16	16	16
	16	16	16
	16	16	16
	16	16	16
		16	16
		16	16
