# Supplementary material for: Repression of hypoxia-inducible factor-1 contributes to increased mitochondrial reactive oxygen species production in diabetes
Source: eLife. 2022 Feb 15;11:e70714. doi: 10.7554/eLife.70714 (PMC8846593; doi:10.7554/eLife.70714)
Supplement: Table 2—source data 1. [file elife-70714-table2-data1.xlsx]

## Sheet: Sheet1
	Table 2: Characteristics of Egln1+/- and WT mice prior to experiments
	Body weight (g)
	WT-control	Egln1+/- Control	WT-diabetic	Egln1+/- diabetic
	25.8	27.1	26.4	25.07
	27.1	25.4	26.73	27.9
	26.7	25.1	26.8	31.9
	34	24.8	28.7	32.7
	35.6	28.1	28.7	26.8
	32.9	31.7	28.3	35.6
	30.7	30	34	33
	29	30	31.8375	26.9
	29	25.5	28	28.4
	28	27	30	31.9
	27	32.3	26.3	31.6
	20.9	26	27.3	22.2
	21.6	24	28.9	24.2
	20	22.5	28.4	25.2
	29.3		33.3	31.6
	29.5		32.2	31
	29.3		32.5	32.7
			29.9	23
			21.7	31.3
			21.7	22.7
			20.1	25.7
			27.9
			29.5
			29.3
	Age (weeks)
	WT-control	Egln1+/- Control	WT-diabetic	Egln1+/- diabetic
	26	27	27	26
	26	26	26	26
	26	26	26	27
	25	26	26	27
	25	26	25	25
	21	27	25	25
	21	25	25	21
	20	19	25	20
	20	19	20	20
	20	27	20	26
	19	27	27	26
	27	26	27	27
	27	26	27	26
	27	27	27	27
	27	26	29	27
	26	26	20	27
	27	27	20	20
	27	22	20	27
	17	19	17	22
	17	19	17	22
	17	19	17	22
	17	19	17
	17	19	17
	17		17
