# Supplementary material for: Repression of hypoxia-inducible factor-1 contributes to increased mitochondrial reactive oxygen species production in diabetes
Source: eLife. 2022 Feb 15;11:e70714. doi: 10.7554/eLife.70714 (PMC8846593; doi:10.7554/eLife.70714)
Supplement: Table 3—source data 1. [file elife-70714-table3-data1.xlsx]

## Sheet: Sheet1
	Table 3: Blood glucose of Egln1+/- and WT mice before and after STZ injection
	Blood glucose (mM) before STZ		Blood glucose (mM) after STZ
	WT-before	Egln1+/- before	WT-after	Egln1+/- after
	3.7	3.3	17.3	18.5
	5.3	4.2	22	14.7
	7.4	4.3	21.1	17.5
	3.3	3.7	23.8	13.5
	6.5	4.3	17.9	21.9
	4	4.2	21.7	18.2
	4.5	3.1	13.6	14.2
	4.1	2.7	28	16.3
	4.1	5.3	16.3	16.3
	5.5	5.2	17.6	12.7
	6.9	4.4	18.9	20.1
	5.5	6.1	22.2	13.2
	4.2	4.6	24.1	18.9
	5.3	3.8	11.9	23.3
	4.3	4.7	24.8	27.6
	4.9	3.7	28	18.4
	4.6	3.2	28	12.6
	5.4	3.4	16.1	20.3
	5.2	3.9	11.6	18.1
	4.1	3.8	13.1	16.6
	7.3	5.9	13.5	18.7
	5.7		20.9
	5.8		17.8
			15.2
